# Supplementary material for: Film formation of non-planar phthalocyanines on copper(i) iodide
Source: Royal Society of Chemistry journal article supplement (doi:10.1039/c6ra21803b), 2016-01-01
Supplement: c6ra21803b1.pdf [file c6ra21803b1.pdf]

## Film formation of non-planar phthalocyanines on copper (I) iodide

A. J. Ramadan,<sup>a</sup> S. Fearn<sup>b</sup>, T.S Jones<sup>c</sup>, S. Heutz<sup>b</sup> and L. A. Rochford<sup>c</sup>

Electronic Supplementary Information (ESI)

Figure S1 – XRD pattern and AFM image of 50nm ClAlPc/SiO<sub>2</sub> grown at RT

Figure S2- XRD pattern and AFM image of 50nm ClAlPc/30nm CuI/SiO<sub>2</sub> grown at RT

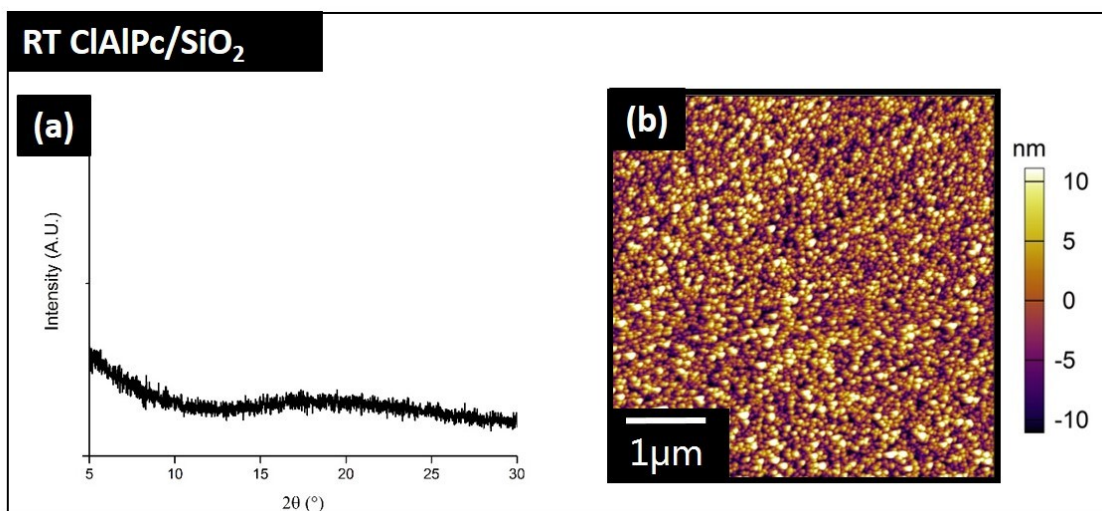

Figure S1 – (a) XRD pattern and (b) AFM topography image of 50nm CIAIPc/SiO<sub>2</sub> grown at a substrate temperature of 25°C.

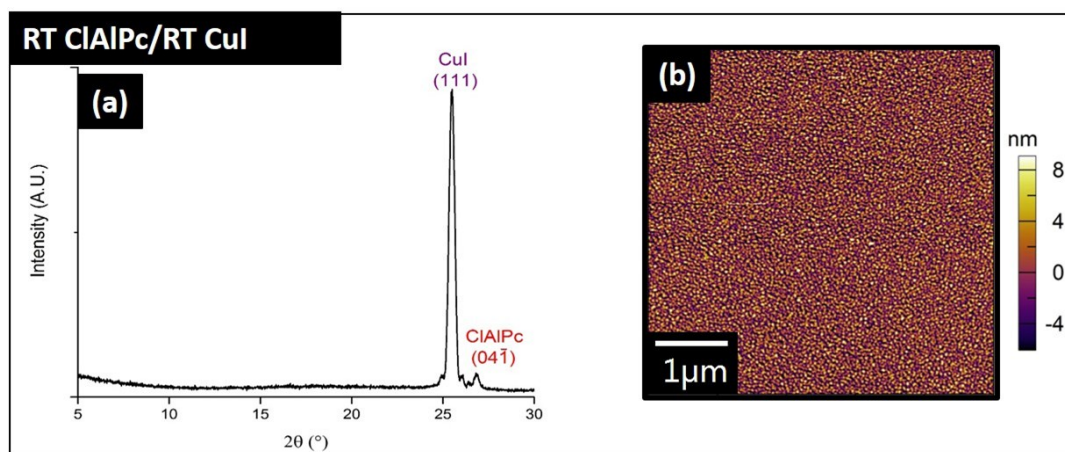

Figure S2 - (a) XRD pattern and (b) AFM topography image of 50nm CIAIPc/30nm CuI/SiO<sub>2</sub> grown at a substrate temperature of 25°C.
